# Supplementary material for: Rapid expansion and extinction of antibiotic resistance mutations during treatment of acute bacterial respiratory infections
Source: PubMed Central journal article supplement (PMC8907320; doi:10.1038/s41467-022-28188-w), 2022-03-09
Supplement: 41467_2022_28188_MOESM2_ESM.pdf [file 41467_2022_28188_MOESM2_ESM.pdf]

## Description of Additional Supplementary Files

**File Name:** Supplementary Data 1

**Description:** List of all genomic variants identified within each patient's pathogen population.

**File Name:** Supplementary Data 2

**Description:** List of all genomic variants identified with each patient's pathogen population at only Day 1.

**File Name:** Supplementary Data 3

**Description:** Primers used for resistance-targeted amplicon sequencing (RETRA-seq).
